# Supplementary material
Source: Springer Nature journal article supplement (https://www.springermedizin.de/resource/supplementary/12974_2009_236_MOESM9_ESM.pdf/9601056)

**rDAF****hDAF****DAPI****Merge****Control**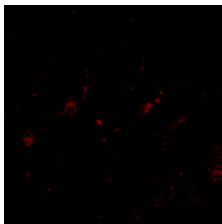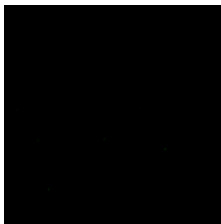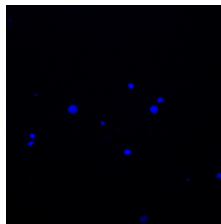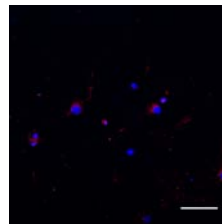**NaCN**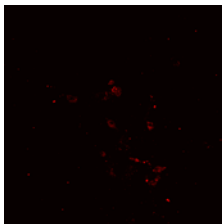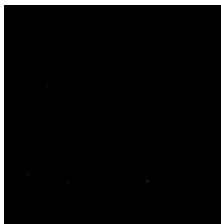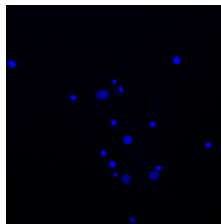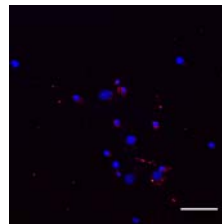**NaCN+DAF**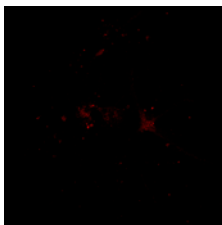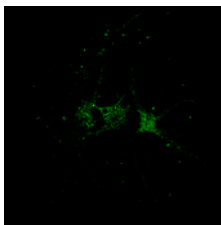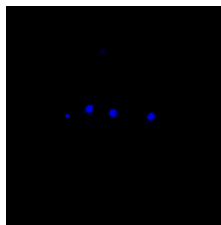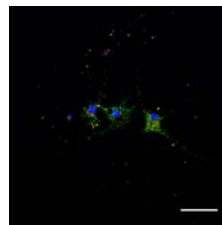**DAF**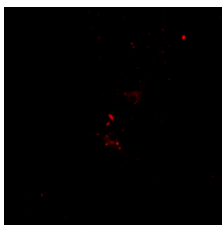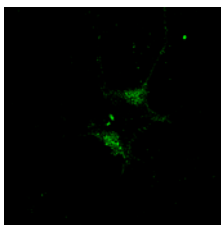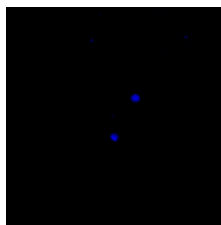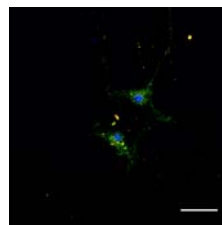**Negative  
Control**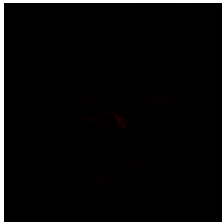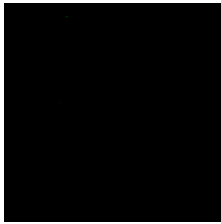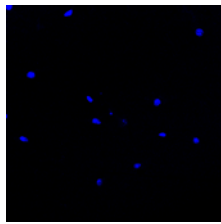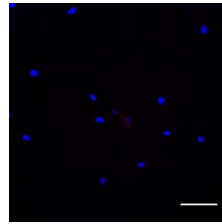

Supplement: MOESM9 [file 9601056]
